# Supplementary material for: Shaping bio-inspired nanotechnologies to target thrombosis for dual optical-magnetic resonance imaging
Source: Royal Society of Chemistry journal article supplement (doi:10.1039/c5tb00879d), 2015-01-01
Supplement: c5tb00879d1.pdf [file c5tb00879d1.pdf]

**Electronic Supplementary Information for**

**Shaping bio-inspired nanotechnologies to target thrombosis for dual optical-  
magnetic resonance imaging**

*Amy M. Wen<sup>1</sup>, Yunmei Wang<sup>2</sup>, Kai Jiang<sup>1</sup>, Greg C. Hsu<sup>3</sup>, Huiyun Gao<sup>2</sup>, Karin L. Lee<sup>1</sup>, Alice C. Yang<sup>1</sup>,  
Xin Yu<sup>1</sup>, Daniel I. Simon<sup>2</sup>, Nicole F. Steinmetz<sup>1,4,5,6\*</sup>*

Departments of <sup>1</sup>Biomedical Engineering, <sup>3</sup>Chemistry, <sup>4</sup>Radiology, <sup>5</sup>Materials Science and Engineering, <sup>6</sup>Macromolecular Science and Engineering, Case Western Reserve University, Cleveland, OH 44106.

<sup>2</sup>Harrington Heart and Vascular Institute, Case Cardiovascular Research Institute, Department of Medicine, University Hospitals Case Medical Center and Case Western Reserve University School of Medicine, Cleveland, OH 44106.

**Corresponding Author: \*[nicole.steinmetz@case.edu](mailto:nicole.steinmetz@case.edu)**

## Supplementary Materials

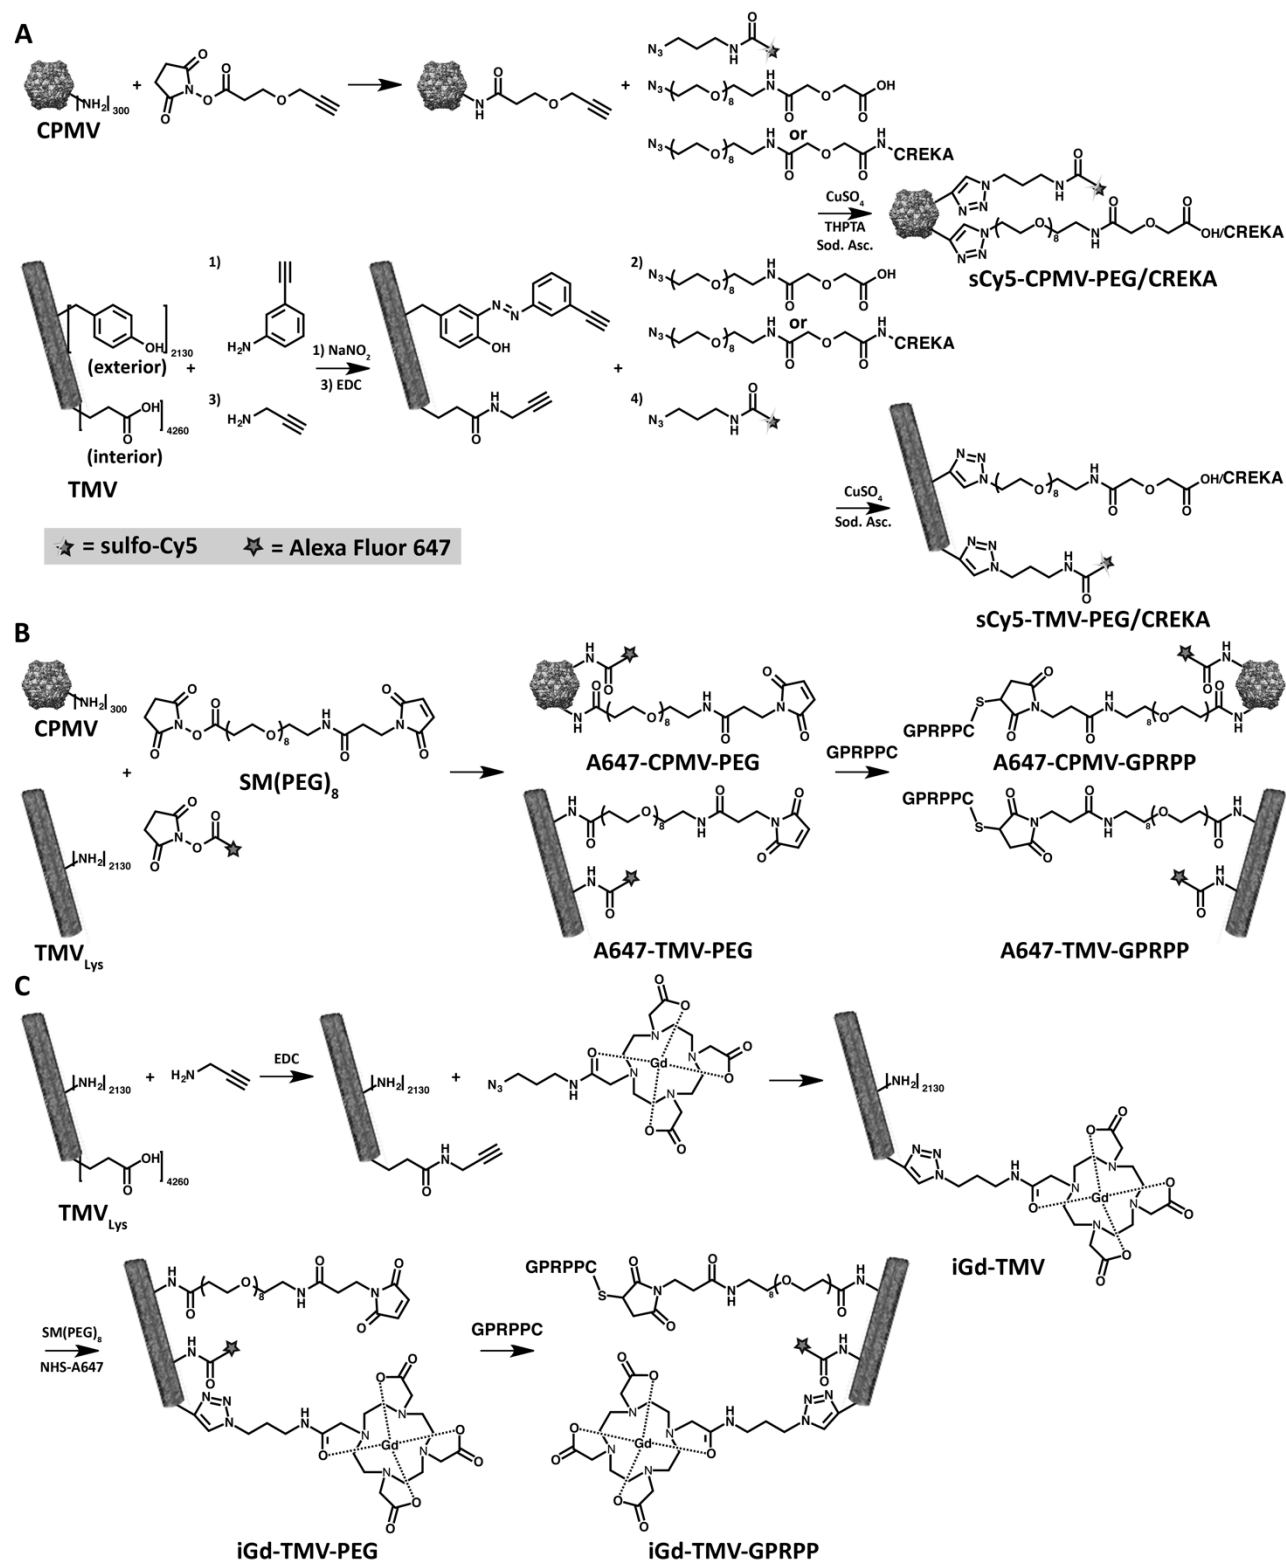

**Fig. S1. Bioconjugation reaction schemes for conjugation of contrast agents along with either PEG or targeting ligands to CPMV and TMV. (A) Synthesis of particles for targeting with CREKA. (B) Particle conjugation for targeting with GPRPP. (C) Additional conjugation of Gd(DOTA) for MR imaging before dye and GPRPP attachment.**

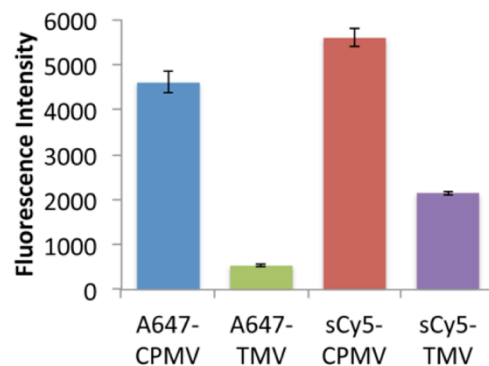

**Fig. S2. Fluorescence intensity measurements of particles.** Fluorescence intensity was measured at a concentration of 0.25 mg/mL, with much higher fluorescence observed for CPMV particles compared to TMV particles. This can be explained by presentation of the fluorophores in varying molecular environments and with varying inter-dye distances given by the elongated rod *versus* the icosahedral shaped carrier system. The data were normalized based on the relative fluorescence intensities.

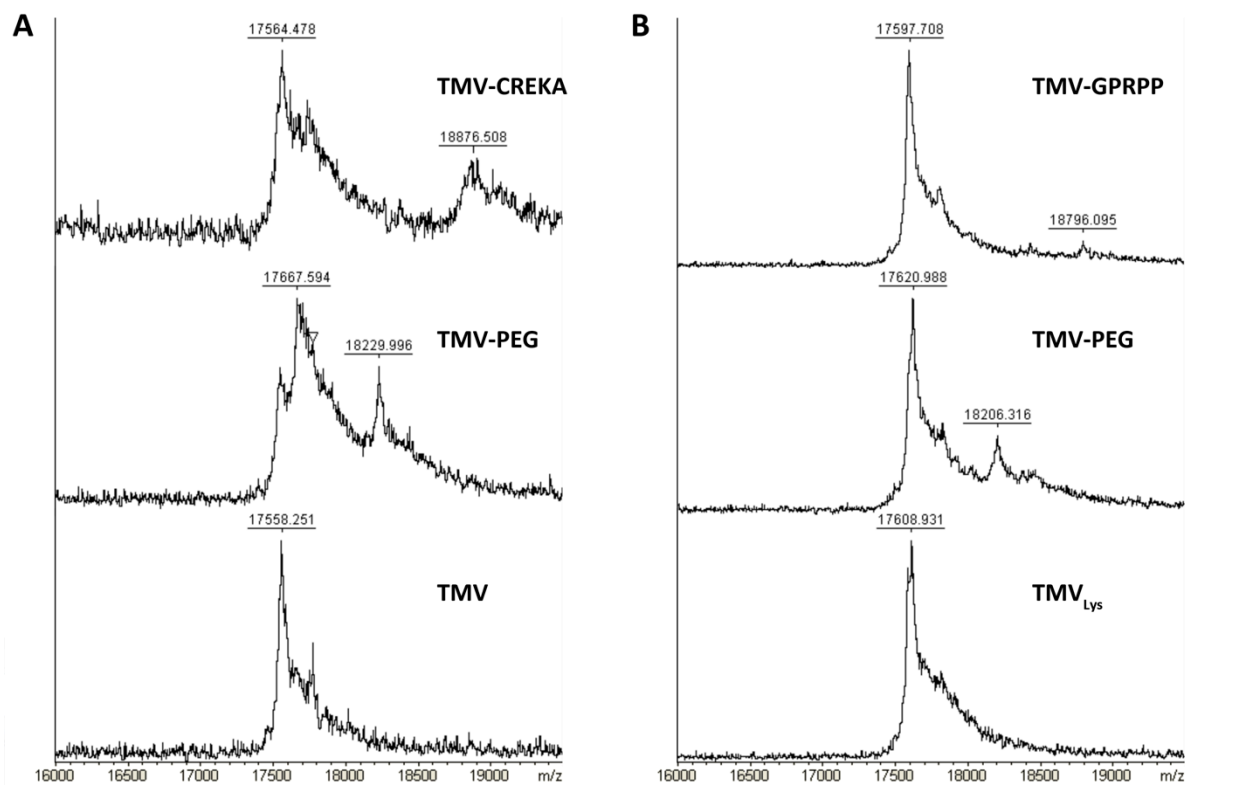

**Fig. S3. MALDI-TOF MS spectra.** (A) Spectra of native TMV, TMV-PEG, and TMV-CREKA particles used for CREKA studies. (B) Spectra of TMV<sub>Lys</sub>, TMV-PEG, and TMV-GPRPP particles used for GPRPP studies. Tabulated masses compared to predicted masses can be found in **Table S3**. Note that this is not a quantitative method as different ionization probabilities (and thus different peak intensities) can result from slight changes in structure.<sup>1</sup>

**Table S1. Measured and theoretical mass for peaks obtained by MALDI-TOF MS.**

| Sample             | Measured Mass | Predicted Mass |
|--------------------|---------------|----------------|
| TMV                | 17,558        | 17,534         |
| TMV-PEG            | 17,668        | 17,534         |
|                    | 18,230        | 18,217         |
| TMV-CREKA          | 17,564        | 17,534         |
|                    | 18,877        | 18,804         |
| TMV <sub>Lys</sub> | 17,609        | 17,561         |
| TMV-PEG            | 17,621        | 17,561         |
|                    | 18,206        | 18,136         |
| TMV-GPRPP          | 17,598        | 17,561         |
|                    | 18,796        | 18,761         |

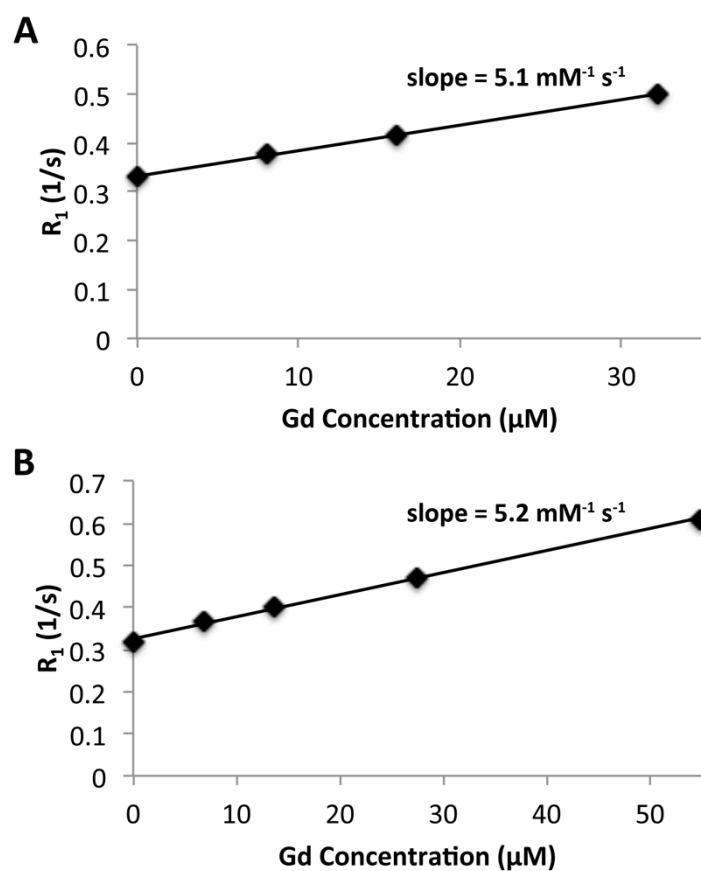

**Fig. S4. Relaxivity measurements.** Determination of relaxivity of Gd(DOTA)-loaded TMV (A) and CPMV (B) was based on a multi-slice saturation recovery Look-Locker sequence to measure  $R_1$  versus Gd concentration.

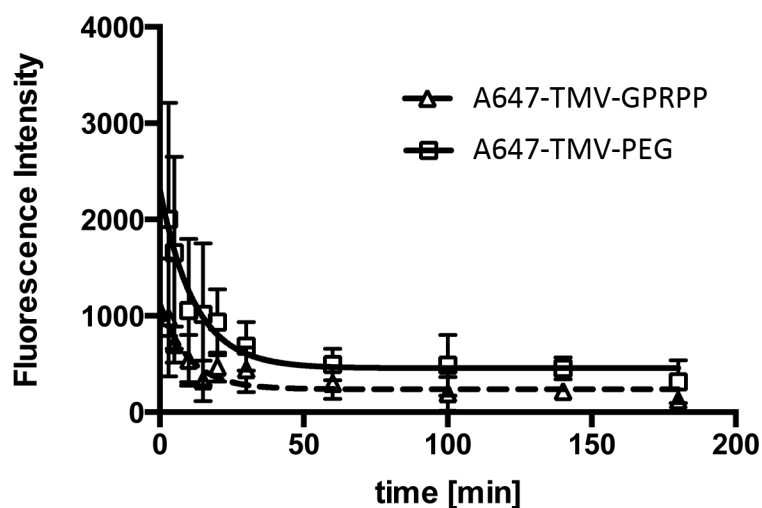

**Fig. S5. Pharmacokinetics of particles.** A647-TMV-GPRPP and A647-TMV-PEG were injected intravenously and fluorescent measurements of serum samples taken at each time point ( $n = 3$ ). Data were analyzed using Prism software. The half-lives of the particles were 6.9 and 8.3 min, respectively.

#### References:

1. S. Weidner, G. Kühn and U. Just, *Rapid Commun. Mass Spectrom.*, 1995, **9**, 697-702.
